# Supplementary material for: Hsa-miRNA-765 as a Key Mediator for Inhibiting Growth, Migration and Invasion in Fulvestrant-Treated Prostate Cancer
Source: PubMed Central journal article supplement (PMC4024001; doi:10.1371/journal.pone.0098037), 2014-05-16
Supplement: pone.0098037.s002.pdf [file pone.0098037.s002.pdf]

## A) Wound Healing Assay

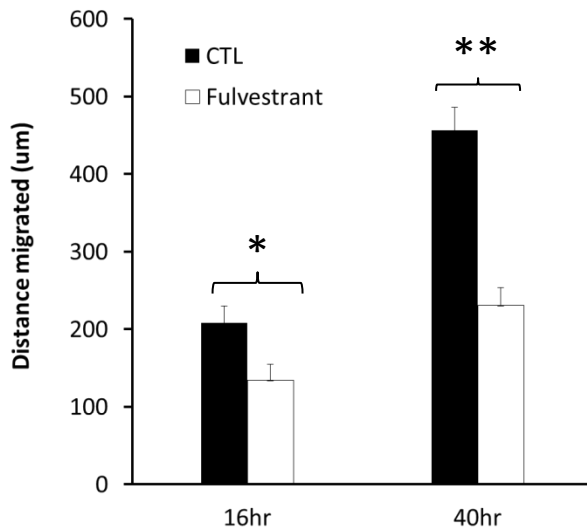

## B) Transwell Invasion Assay

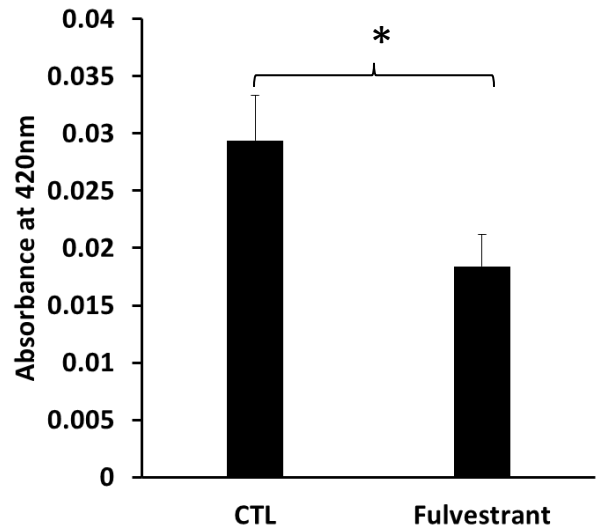

**Figure S2.** Fulvestrant significantly inhibits PC-3 cell migration and invasion. (A) Fulvestrant suppresses PC-3 cell migration. A wound-healing assay was performed on the fulvestrant- and vehicle-treated PC-3 cells (n=3). Migration distance of the fulvestrant- and vehicle-treated (24 hr treatment) cell cultures with scratches at 0 h and after 16 h and 40 hr was measured. (B) Fulvestrant inhibits transwell invasion in PC-3 cells (n=5) after 24 hr of fulvestrant treatment. Student t-test was performed to determine significance between ICI and CTL group with a cutoff p value of 0.05. \*\* p<0.01; bars = S.D.
