# Supplementary material for: Hsa-miRNA-765 as a Key Mediator for Inhibiting Growth, Migration and Invasion in Fulvestrant-Treated Prostate Cancer
Source: PubMed Central journal article supplement (PMC4024001; doi:10.1371/journal.pone.0098037), 2014-05-16
Supplement: pone.0098037.s005.pdf [file pone.0098037.s005.pdf]

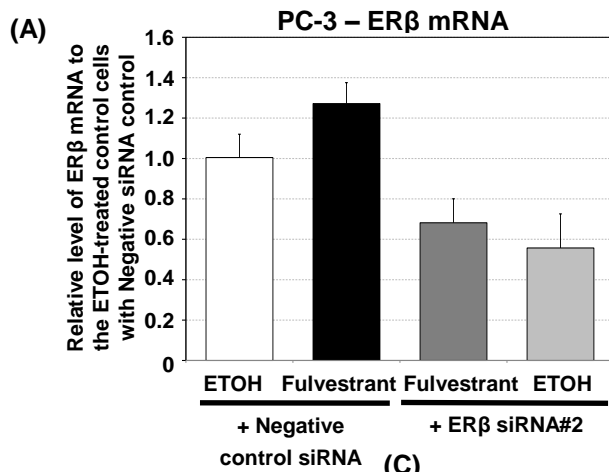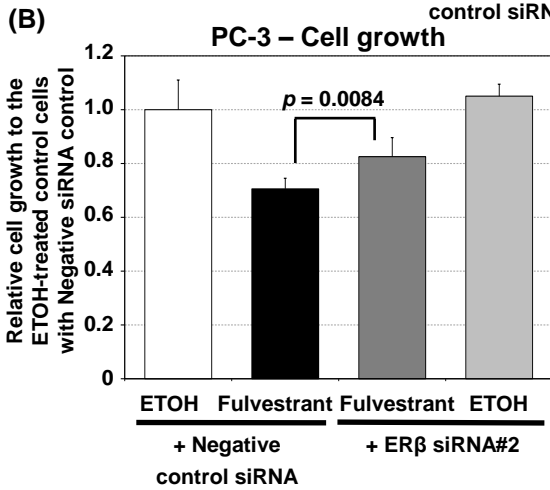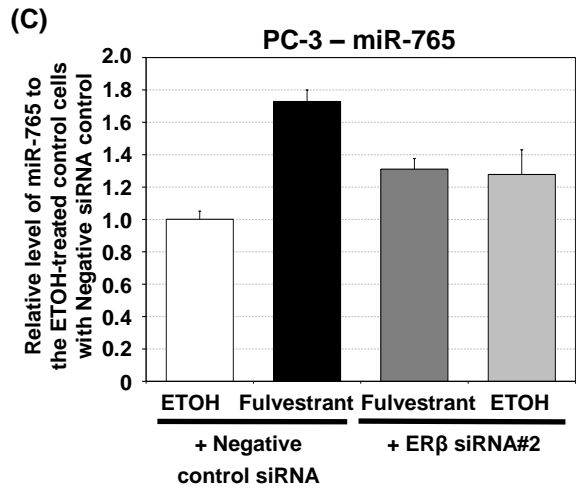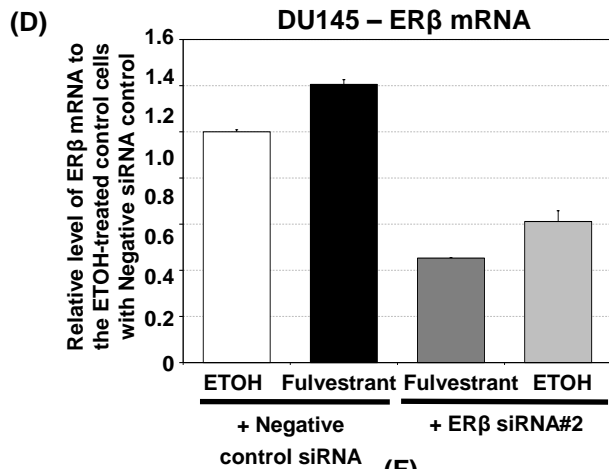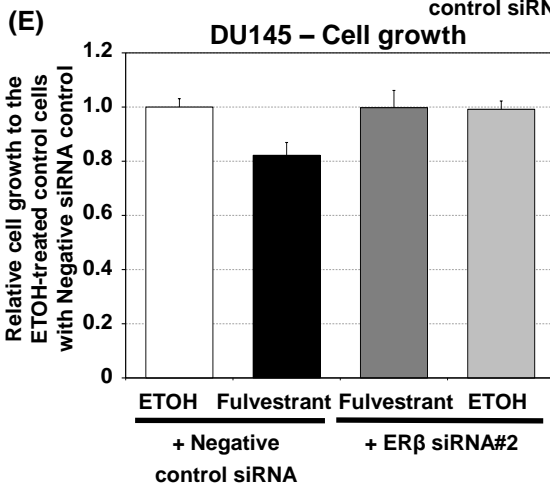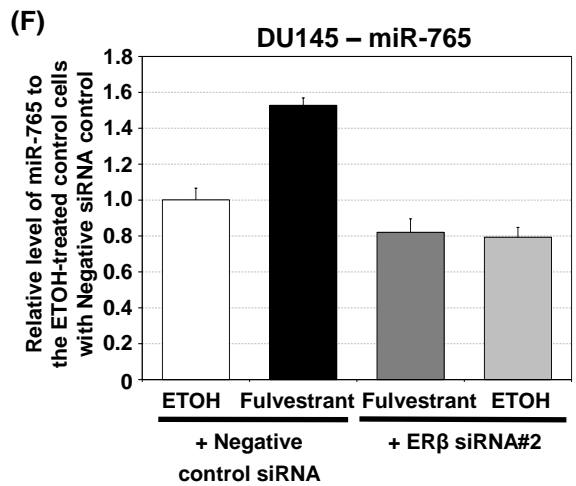

**Figure S5.** Blocking effects of another ER $\beta$  siRNA on prostate cancer cell growth and up-regulation of hsa-miR-765 expression. (A and D) Effectiveness of siRNA#2 on knockdown of ER $\beta$  in PC-3 (A) and DU145 (D) cells. PC-3 and DU145 cells were treated with fulvestrant or ethanol (Control) in the presence of ER $\beta$  siRNA or negative-control siRNA for 4 days. The levels of ER $\beta$  in the cells were quantified by real-time RT-PCR analysis. Fulvestrant inhibits PC-3 and DU145 cell growth and up-regulated has-miR-765 expression via an ER $\beta$ -dependent mechanism. (B and E) Growth of the fulvestrant-treated PC-3 (B) and DU145 (E) cells with or without ER $\beta$  siRNA knockdown for 4 days relative to the ethanol-treated control cells with negative-control siRNA are presented and compared (n=8) (C and F) *Hsa-miR-765* is induced by fulvestrant in PC-3 (C) and DU145 (F) cells in an ER $\beta$ -dependent mechanism. The hsa-miR-765 in the fulvestrant- and ethanol-treated control cells was quantified by miRNA qRT-PCR analysis. Relative fold changes between the expression of *hsa-miR-765* in the fulvestrant-treated and control cells are presented. Columns=means; bars =S.D.; n=3.
