# Supplementary material for: Hsa-miRNA-765 as a Key Mediator for Inhibiting Growth, Migration and Invasion in Fulvestrant-Treated Prostate Cancer
Source: PubMed Central journal article supplement (PMC4024001; doi:10.1371/journal.pone.0098037), 2014-05-16
Supplement: pone.0098037.s007.pdf [file pone.0098037.s007.pdf]

**Table S1: Fulvestrant-regulated miRNAs**

| <b>Upregulated miRNAs</b> | <b>Control</b> | <b>Fulvestrant-treated</b> | <b>Ratio</b> | <b>p-values</b> |
|---------------------------|----------------|----------------------------|--------------|-----------------|
| <b>hsa-miR-185</b>        | 319 ± 7        | 1228 ± 119                 | 3.8519       | 0.0002          |
| <b>hsa-let-7b</b>         | 2276 ± 105     | 3546 ± 148                 | 1.5583       | 0.0003          |
| <b>hsa-miR-765</b>        | 2001 ± 459     | 7523 ± 715                 | 3.7599       | 0.0004          |
| <b>hsa-let-7a</b>         | 2115 ± 249     | 5073 ± 734                 | 2.3992       | 0.0027          |
| <b>hsa-miR-601</b>        | 317 ± 206      | 1271 ± 215                 | 4.0130       | 0.0052          |
| <b>hsa-miR-768-5p</b>     | 461 ± 124      | 1041 ± 140                 | 2.2605       | 0.0055          |

Normalized signal intensities of the upregulated miRNAs with a cutoff p value of 0.05
