# Supplementary material for: Hsa-miRNA-765 as a Key Mediator for Inhibiting Growth, Migration and Invasion in Fulvestrant-Treated Prostate Cancer
Source: PubMed Central journal article supplement (PMC4024001; doi:10.1371/journal.pone.0098037), 2014-05-16
Supplement: pone.0098037.s008.pdf [file pone.0098037.s008.pdf]

Table S2. Primer and oligo sequences used in the study.

|                                                               | Primer/Oligo sequences (5'----3') |
|---------------------------------------------------------------|-----------------------------------|
| <b>A. <u>Real-time qPCR for miRNAs/small nuclear RNA</u></b>  |                                   |
| <b>hsa-miR-765</b>                                            |                                   |
| hsa-miR-765 qRT forward primer                                | TGGAGGAGAAGGAAGGTGATG             |
| Universal qPCR reverse primer                                 | N.A.                              |
| <b>RNU6</b>                                                   |                                   |
| RNU6 qRT forward primer                                       | CGCAAGGATGACACGCAAAT              |
| Universal qPCR reverse primer                                 | N.A.                              |
| <b>B. <u>Real-time RT-PCR for gene mRNA</u></b>               |                                   |
| <b>HMGA1 mRNA</b>                                             |                                   |
| HMGA1-qRT-PCR-F                                               | GAAAAGGACGGCACTGAGAA              |
| HMGA1-qRT-PCR-R                                               | CTTCCTGGAGTTGTGGTGGT              |
| <b>RPS3 mRNA</b>                                              |                                   |
| RPS3-qRT-PCR-F                                                | AGCCACCAGAACACAGAATG              |
| RPS3-qRT-PCR-R                                                | CTAGTGGCCACCTTTTCAGC              |
| <b>C. <u>Promoter analysis</u></b>                            |                                   |
| <b>5' upstream sequence of hsa-miR-765</b>                    |                                   |
| hsa-miR-765 promoter -F                                       | GGAAGATCTCTGGCACAAACCAACTACCA     |
| hsa-miR-765 promoter -R                                       | CCCAAGCTTCTCCTCCAGAAACCCCAGTT     |
| <b>D. <u>miR-765 target sites into pMIR-REPORT vector</u></b> |                                   |
| <b>3'UTR HMGA1</b>                                            |                                   |
| HMGA1 3 UTR-F                                                 | GGACTAGTCCTGCTCCTCACTGGAGGAG      |
| HMGA1 3 UTR-R                                                 | CCCAAGCTTAGTAACTGCAAATAGGAAACC    |
| <b>Complementary hsa-miR-765 recognition site</b>             |                                   |
| miR-765-Insert-sense oligo                                    | CTAGTTTGCATCACCTTCCTTCTCCTCCACCCA |
| miR-765-Insert-antisense oligo                                | AGCTTGGGTGGAGGAGAAGGAAGGTGATGCAAA |
| <b>E. <u>Chromatin Immunoprecipitation assay</u></b>          |                                   |
| ChIP-PCR-F                                                    | AAGTGATCCACCCACCTCAG              |
| ChIP-PCR-R                                                    | CCAGTTTCTCGTAGGGCTTG              |
