# Supplementary material for: Hsa-miRNA-765 as a Key Mediator for Inhibiting Growth, Migration and Invasion in Fulvestrant-Treated Prostate Cancer
Source: PubMed Central journal article supplement (PMC4024001; doi:10.1371/journal.pone.0098037), 2014-05-16
Supplement: pone.0098037.s009.pdf [file pone.0098037.s009.pdf]

Table S3. Sources of the antibodies used in the study. The primary antibodies were diluted in 3% non-fat milk powder/5% bovine serum albumin in PBS in accordance with the recommended concentrations.

| <b>Protein targets of antibodies</b>                             | <b>Source*</b> |
|------------------------------------------------------------------|----------------|
| Cyclin A                                                         | Novocastra     |
| Cyclin B1                                                        | CST            |
| Cyclin E1                                                        | BD             |
| cdc2                                                             | CST            |
| Phosphorylated cdc2 (Tyr15)                                      | CST            |
| cdc25C                                                           | CST            |
| $\beta$ -actin                                                   | Sigma          |
| ER $\beta$                                                       | SCB            |
| HMGA1                                                            | Abcam          |
| goat anti-mouse IgG antibody HRP conjugated (secondary antibody) | SCB            |

\* Novocastra, Newcastle upon Tyne, UK; CST denotes Cell Signaling Technology, Danvers, MA; BD denotes Becton Dickinson Pharmingen, San Diego, CA; Sigma-Aldrich Corporate, St. Louis, MO; SCB denotes Santa Cruz Biotechnology, Santa Cruz, CA; Dako, Carpinteria, CA., Abcam, Cambridge, UK.
